# Supplementary material
Source: PubMed Central journal article supplement (PMC3366688)
Supplement: NIHMS374044-supplement-Table_S1.pdf [file NIHMS374044-supplement-Table_S1.pdf]

## Supplemental Information

**Table S1. Mouse primers used for PCR analysis**

| Gene                             |         | Primer Sequence          | Ta(°C) | PCR product (bp) |
|----------------------------------|---------|--------------------------|--------|------------------|
| <i>PGC-1alpha</i>                | Forward | CACCAAACCCACAGAAAACAG    | 60     | 125              |
|                                  | Reverse | GGGTCAGAGGAAGAGATAAAGTTG |        |                  |
| <i>PGC-1beta</i>                 | Forward | GGTGTTCGGTGAGATTGTAGAG   | 60     | 131              |
|                                  | Reverse | GTGATAAAACCGTGCTTCTGG    |        |                  |
| <i>NRF-1</i>                     | Forward | AATGTCCGCAGTGATGTCC      | 60     | 149              |
|                                  | Reverse | GCCTGAGTTTGTGTTTGCTG     |        |                  |
| <i>NRF-2</i>                     | Forward | TGAAGTTCGCATTTTGATGGC    | 60     | 149              |
|                                  | Reverse | CTTTGGTCCTGGCATCTCTAC    |        |                  |
| <i>TFAM</i>                      | Forward | CACCCAGATGCAAACTTTCAG    | 60     | 147              |
|                                  | Reverse | CTGCTCTTTATACTTGCTCACAG  |        |                  |
| <i>TFB1M</i>                     | Forward | ATAGAGCCCAAGATCAAGCAG    | 60     | 146              |
|                                  | Reverse | TGTAACAGCCTTCCAGTGC      |        |                  |
| <i>TFB2M</i>                     | Forward | ACCAAAACCCATCCCGTC       | 60     | 141              |
|                                  | Reverse | TCTGTAAGGGCTCCAAATGTG    |        |                  |
| <i>NDUFS8</i>                    | Forward | G TTCATAGGGTCAGAGGTCAAG  | 60     | 115              |
|                                  | Reverse | TCCATTAAGATGTCCTGTGCG    |        |                  |
| <i>ND1</i>                       | Forward | TGCACCTACCCTATCACTCA     | 60     | 148              |
|                                  | Reverse | GGCTCATCCTGATCATAGAATGG  |        |                  |
| <i>COX5b</i>                     | Forward | ACCCTAATCTAGTCCCGTCC     | 60     | 89               |
|                                  | Reverse | CAGCCAAAACCAGATGACAG     |        |                  |
| <i>COX1</i>                      | Forward | CCCAGATATAGCATTCCCACG    | 60     | 117              |
|                                  | Reverse | ACTGTTTATCCTGTTTCTGC     |        |                  |
| <i>MCAD</i>                      | Forward | TGTTAATCGGTGAAGGAGCAG    | 60     | 133              |
|                                  | Reverse | CTATCCAGGGCATACTTCGTG    |        |                  |
| <i>LCAD</i>                      | Forward | GGTGGAAAACGGAATGAAAGG    | 60     | 123              |
|                                  | Reverse | GGCAATCGGACATCTTCAAAG    |        |                  |
| <i>CPT1b</i>                     | Forward | CCTCCGAAAAGCACCAAAAC     | 60     | 143              |
|                                  | Reverse | GCTCCAGGGTTCAGAAAGTAC    |        |                  |
| GLUT1                            | Forward | TCAAACATGGAACCACCGCTA    | 60     | 123              |
|                                  | Reverse | AAGAGGCCGACAGAGAAGGAA    |        |                  |
| GLUT4                            | Forward | ACCGGATTCCATCCCACAAG     | 60     | 137              |
|                                  | Reverse | TCCCAACCATTGAGAAATGATGC  |        |                  |
| <i>Rsp18</i><br>(mtDNA analysis) | Forward | TGTGTTAGGGGACTGGTGGACA   | 60     | 195              |
|                                  | Reverse | CATCACCCACTTACCCCCAAA    |        |                  |
| <i>COX2</i><br>(mtDNA analysis)  | Forward | ATAACCGAGTCGTTCTGCCAAT   | 60     | 180              |
|                                  | Reverse | TTTCAGAGCATTGGCCATAGAA   |        |                  |

Ta, Temperature of annealing

**Table S2. Rat primers used for PCR analysis**

| Gene                   |         | Primer Sequence             | Ta(°C) | PCR product (bp) |
|------------------------|---------|-----------------------------|--------|------------------|
| <i>PGC-1alpha</i>      | Forward | CTGCTCTTGAGAATGGATATACTT    | 58     | 153              |
|                        | Reverse | CATACTTGCTCTTGGTGGAA        |        |                  |
| <i>TFAM</i>            | Forward | AAATGGCTGAAGTTG GGC GAA GTG | 59     | 119              |
|                        | Reverse | AGC TTC TTG GGC GAA GTG     |        |                  |
| <i>COX4</i>            | Forward | GGCAGAATGTTGGCTACC          | 59     | 107              |
|                        | Reverse | GCATAGTCTTCACTCTTCACAA      |        |                  |
| <i>COX2</i>            | Forward | CCAGTATTAGCAGCAGGTATC       | 58     | 119              |
|                        | Reverse | CCGAAGAATCAGAATAGGTGTT      |        |                  |
| <i>Troponin 1 Fast</i> | Forward | CTGAGGGGCAAGTTCAAGAG        | 58     | 224              |
|                        | Reverse | ATCTTCTTCCGACCCTCCAT        |        |                  |
| <i>Troponin 1 Slow</i> | Forward | GACTGGAGGAAGAACGTGGA        | 58     | 203              |
|                        | Reverse | GCTTGAACCCAAGAGAGCTG        |        |                  |
| <i>MyHCIIa</i>         | Forward | CTGAGGAACAATCCAACACAAA      | 60     | 188              |
|                        | Reverse | TCTCTTCGGTCATTCTACAGCA      |        |                  |
| <i>MyHCIIb</i>         | Forward | AGAAAATCAAGAAGCAAATTGACC    | 58     | 207              |
|                        | Reverse | ACTCCACTACTCTGAGGTGGTTTC    |        |                  |
| Actin                  | Forward | CACCCGCGAGTACAACCTTC        | 59     | 207              |
|                        | Reverse | CCCATACCCACCATCACACC        |        |                  |

Ta, Temperature of annealing
